# Supplementary material for: The impact of three progressively introduced interventions on second wave daily COVID-19 case numbers in Melbourne, Australia
Source: bioRxiv or medRxiv preprint supplement (doi:10.1101/2021.05.29.21258055), 2021-06-02
Supplement: Supplementary file [file media-1.pdf]

## A. Goodness of fit tests for regression analysis

This supplement describes the tests undertaken on the regression analysis shown in Figure 1A of the main paper.

In a valid multiple linear regression, it is expected that the residuals meet the following criteria:

- **Linearity:** The  $\varepsilon_i$  have mean of 0
- **Independence:** The  $\varepsilon_i$  are independent
- **Normality:** The  $\varepsilon_i$  are normally distributed
- **Homogeneity of variances:** The  $\varepsilon_i$  have the same variance  $\sigma^2$

We primarily test using the Studentized residuals  $\mathcal{E}_i$  since raw residuals are not expected to be completely independent but provide some test results with the raw residuals

### Linearity

|               |                       |
|---------------|-----------------------|
|               | Mean                  |
| Raw Residuals | $4.0 \times 10^{-16}$ |

Expect zero. Pass

### Independence

#### Durban-Watson Test

|                                          |       |
|------------------------------------------|-------|
| Test value negative autocorrelation      | 2.040 |
| Test value positive autocorrelation      | 1.574 |
| Critical upper limit for $\alpha = 0.05$ | 1.753 |

Test values are both greater than the critical upper limit so no positive or negative autocorrelation is detected. Therefore there is no evidence for lack of independence.

#### Graphical display

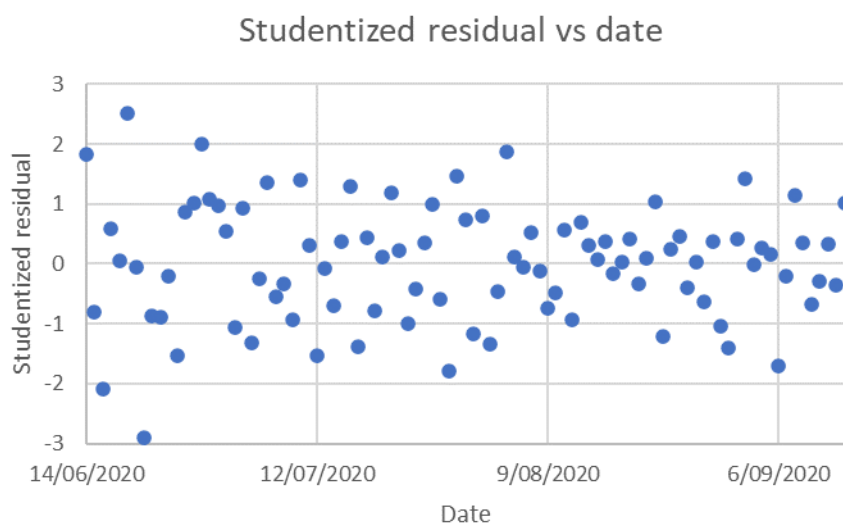

Fig. S1. Plot of Studentized residuals *versus* day of the study. The knot days were 11 July, 1 August and 12 August

**Normality**

*Shapiro-Wilk test*

|         |          |
|---------|----------|
|         | residual |
| W-stat  | 0.997    |
| p-value | 0.8321   |

Test passes for residuals ( $p > 0.05$ )

*Graphical QQ Plot*

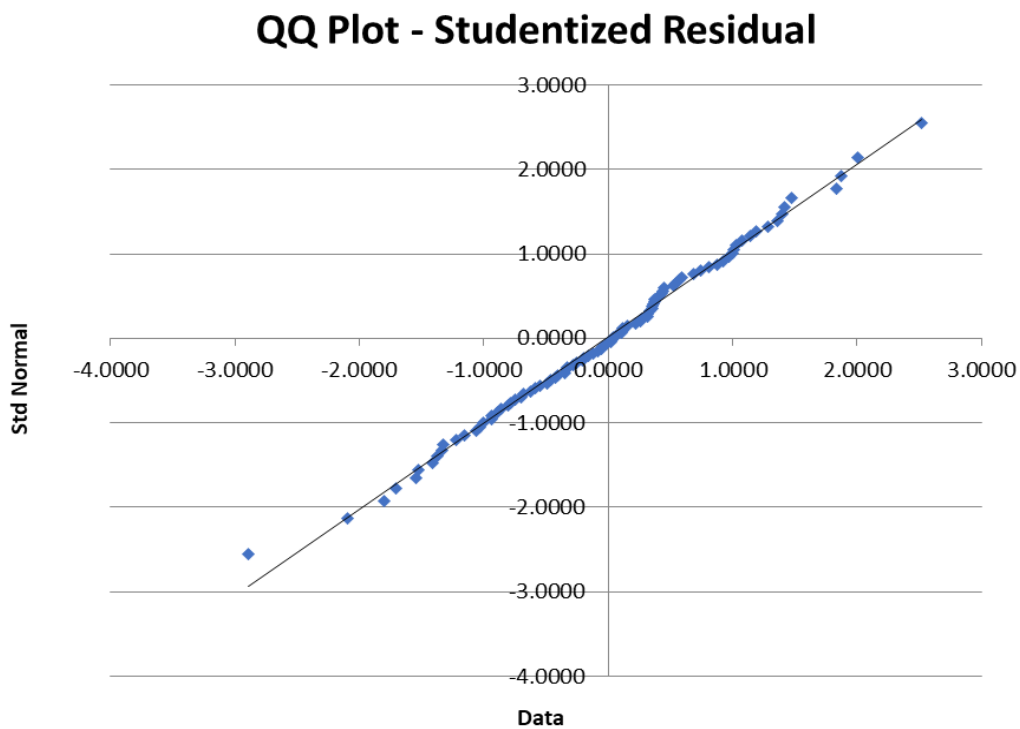

Fig. S2. QQ (Quantile-Quantile) plot of the ordered Studentized residuals vs a the corresponding quantiles of a normal distribution. Black line indicates the position of a perfectly normally distributed Studentized residuals.

**Homogeneity of Variances**

*Test for Heteroskedasticity with Breusch-Pagan test over the range 14 June to 14 September (i.e pre-Stage 3 to the end of the analysis in Stage 4)*

|                              |       |
|------------------------------|-------|
| Number of Days               | 93    |
| No. of Independent variables | 4     |
| LM statistic                 | 17.81 |
| Degrees of Freedom           | 2     |

p-value 0.0013

Pass criteria: p value >0.05. Fail

*Test for Heteroskedasticity with Breusch-Pagan test over the range 11 July to 14 September (i.e just Stage 3 to the end of the analysis in Stage 4)*

|                              |      |
|------------------------------|------|
| Number of Days               | 66   |
| No. of Independent variables | 4    |
| LM statistic                 | 7.57 |
| Degrees of Freedom           | 2    |
| p-value                      | 0.11 |

Pass criteria: p value >0.05. pass

Also see Fig S1

### Other test

Regression was tested for the influence of outliers using Cook's D test. As shown below, the maximum Cook's D value was 0.109 on 16 June 2020. As this is much less than 1, there are no outliers with a significant impact on the regression.

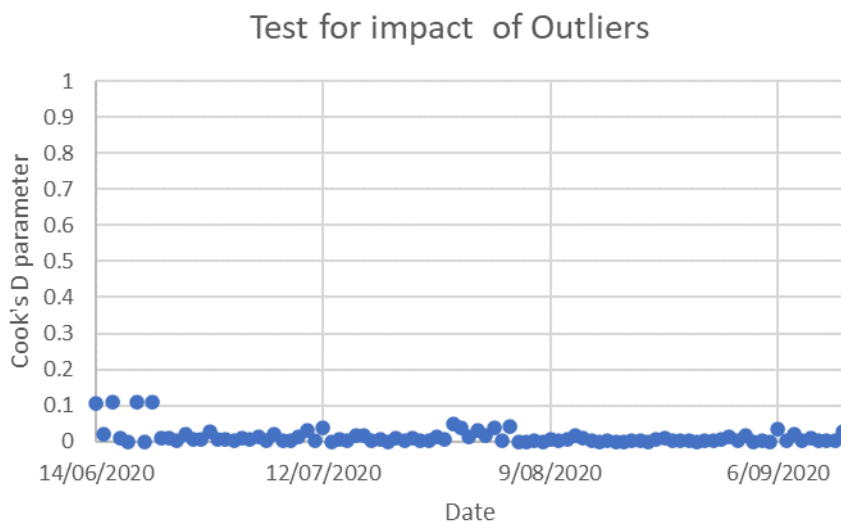

## B. Reference

All tests were performed using the Excel routines available from

Zaiontz, C. 2020 Real Statistics Using Excel. Version 7.3.3 <https://www.real-statistics.com/>
